# Supplementary material for: The Role of Kt/V and Creatinine Clearance on Assisting Optimization of Serum Phosphorus Levels among Patients on Peritoneal Dialysis
Source: PubMed Central journal article supplement (PMC11793178; doi:10.34067/kid.0000000618), 2024-10-11
Supplement: kidney360-6-105-s001.pdf [file kidney360-6-105-s001.pdf]

## ASN Journal Disclosure Form

As per ASN journal policy, I have disclosed any financial relationships or commitments I have held in the past 36 months as included below. I have listed my Current Employer below to indicate there is a relationship requiring disclosure. If no relationship exists, my Current Employer is not listed.

L. Chan reports the following:

Employer: Icahn School of Medicine at Mount Sinai; Consultancy: CSL Vifor Pharma, INC; and Research Funding: NIH.

I understand that the information above will be published within the journal article, if accepted, and that failure to comply and/or to accurately and completely report the potential financial conflicts of interest could lead to the following: 1) Prior to publication, article rejection, or 2) Post-publication, sanctions ranging from, but not limited to, issuing a correction, reporting the inaccurate information to the authors' institution, banning authors from submitting work to ASN journals for varying lengths of time, and/or retraction of the published work.

Name: Lili Chan

Manuscript ID: K360-2024-000265R2

Manuscript Title: The role of Kt/V and creatinine clearance on assisting optimization of serum phosphorus levels among patients on PD

Date of Completion: August 26, 2024

Disclosure Updated Date: May 8, 2024

## ASN Journal Disclosure Form

As per ASN journal policy, I have disclosed any financial relationships or commitments I have held in the past 36 months as included below. I have listed my Current Employer below to indicate there is a relationship requiring disclosure. If no relationship exists, my Current Employer is not listed.

A. De la Torre Quiroga reports the following:  
Employer: ITESM

I understand that the information above will be published within the journal article, if accepted, and that failure to comply and/or to accurately and completely report the potential financial conflicts of interest could lead to the following: 1) Prior to publication, article rejection, or 2) Post-publication, sanctions ranging from, but not limited to, issuing a correction, reporting the inaccurate information to the authors' institution, banning authors from submitting work to ASN journals for varying lengths of time, and/or retraction of the published work.

Name: Andres E. De la Torre Quiroga

Manuscript ID: K360-2024-000265R2

Manuscript Title: The role of Kt/V and creatinine clearance on assisting optimization of serum phosphorus levels among patients on PD.

Date of Completion: August 26, 2024

Disclosure Updated Date: August 26, 2024

## ASN Journal Disclosure Form

As per ASN journal policy, I have disclosed any financial relationships or commitments I have held in the past 36 months as included below. I have listed my Current Employer below to indicate there is a relationship requiring disclosure. If no relationship exists, my Current Employer is not listed.

M. Diaz Bessone reports the following:  
Employer: Fresenius Medical Care

I understand that the information above will be published within the journal article, if accepted, and that failure to comply and/or to accurately and completely report the potential financial conflicts of interest could lead to the following: 1) Prior to publication, article rejection, or 2) Post-publication, sanctions ranging from, but not limited to, issuing a correction, reporting the inaccurate information to the authors' institution, banning authors from submitting work to ASN journals for varying lengths of time, and/or retraction of the published work.

Name: Maria Ines Diaz Bessone

Manuscript ID: K360-2024-000265R2

Manuscript Title: The role of Kt/V and creatinine clearance on assisting optimization of serum phosphorus levels among patients on PD.

Date of Completion: October 1, 2024

Disclosure Updated Date: October 1, 2024

## ASN Journal Disclosure Form

As per ASN journal policy, I have disclosed any financial relationships or commitments I have held in the past 36 months as included below. I have listed my Current Employer below to indicate there is a relationship requiring disclosure. If no relationship exists, my Current Employer is not listed.

D. Farrell reports the following:

Employer: Icahn School of Medicine at Mount Sinai

I understand that the information above will be published within the journal article, if accepted, and that failure to comply and/or to accurately and completely report the potential financial conflicts of interest could lead to the following: 1) Prior to publication, article rejection, or 2) Post-publication, sanctions ranging from, but not limited to, issuing a correction, reporting the inaccurate information to the authors' institution, banning authors from submitting work to ASN journals for varying lengths of time, and/or retraction of the published work.

Name: Douglas R. Farrell

Manuscript ID: K360-2024-000265R2

Manuscript Title: The role of Kt/V and creatinine clearance on assisting optimization of serum phosphorus levels among patients on PD.

Date of Completion: September 26, 2024

Disclosure Updated Date: September 26, 2024

## ASN Journal Disclosure Form

As per ASN journal policy, I have disclosed any financial relationships or commitments I have held in the past 36 months as included below. I have listed my Current Employer below to indicate there is a relationship requiring disclosure. If no relationship exists, my Current Employer is not listed.

G. Garcia-Garcia reports the following:

Employer: University of Guadalajara Health Sciences Center; Consultancy: Ellen Medical Devices, LTD; Patents or Royalties: Elsevier Inc.; and Other Interests or Relationships: Associate editor, CJASN.

I understand that the information above will be published within the journal article, if accepted, and that failure to comply and/or to accurately and completely report the potential financial conflicts of interest could lead to the following: 1) Prior to publication, article rejection, or 2) Post-publication, sanctions ranging from, but not limited to, issuing a correction, reporting the inaccurate information to the authors' institution, banning authors from submitting work to ASN journals for varying lengths of time, and/or retraction of the published work.

Name: Guillermo Garcia-Garcia

Manuscript ID: K360-2024-000265R1

Manuscript Title: "The role of Kt/V and creatinine clearance on assisting optimization of serum phosphorus levels among patients on PD.,"

Date of Completion: July 25, 2024

Disclosure Updated Date: May 7, 2024

## ASN Journal Disclosure Form

As per ASN journal policy, I have disclosed any financial relationships or commitments I have held in the past 36 months as included below. I have listed my Current Employer below to indicate there is a relationship requiring disclosure. If no relationship exists, my Current Employer is not listed.

M. Guedes reports the following:

Research Funding: AstraZeneca; and Honoraria: Astrazeneca.

I understand that the information above will be published within the journal article, if accepted, and that failure to comply and/or to accurately and completely report the potential financial conflicts of interest could lead to the following: 1) Prior to publication, article rejection, or 2) Post-publication, sanctions ranging from, but not limited to, issuing a correction, reporting the inaccurate information to the authors' institution, banning authors from submitting work to ASN journals for varying lengths of time, and/or retraction of the published work.

Name: Murilo Henrique Guedes

Manuscript ID: K360-2024-000265R2

Manuscript Title: The role of Kt/V and creatinine clearance on assisting optimization of serum phosphorus levels among patients on PD.

Date of Completion: September 26, 2024

Disclosure Updated Date: September 26, 2024

## ASN Journal Disclosure Form

As per ASN journal policy, I have disclosed any financial relationships or commitments I have held in the past 36 months as included below. I have listed my Current Employer below to indicate there is a relationship requiring disclosure. If no relationship exists, my Current Employer is not listed.

A. Guinsburg reports the following:

Employer: Fresenius Medical Care; and Advisory or Leadership Role: Chief Clinical Officer Fresenius Medical Care LatAm.

I understand that the information above will be published within the journal article, if accepted, and that failure to comply and/or to accurately and completely report the potential financial conflicts of interest could lead to the following: 1) Prior to publication, article rejection, or 2) Post-publication, sanctions ranging from, but not limited to, issuing a correction, reporting the inaccurate information to the authors' institution, banning authors from submitting work to ASN journals for varying lengths of time, and/or retraction of the published work.

Name: Adrian M. Guinsburg

Manuscript ID: K360-2024-000265R1

Manuscript Title: The role of Kt/V and creatinine clearance on assisting optimization of serum phosphorus levels among patients on PD

Date of Completion: July 25, 2024

Disclosure Updated Date: May 16, 2024

## ASN Journal Disclosure Form

As per ASN journal policy, I have disclosed any financial relationships or commitments I have held in the past 36 months as included below. I have listed my Current Employer below to indicate there is a relationship requiring disclosure. If no relationship exists, my Current Employer is not listed.

C. Konings reports the following:

Employer: Catharina Hospital Eindhoven Holland

I understand that the information above will be published within the journal article, if accepted, and that failure to comply and/or to accurately and completely report the potential financial conflicts of interest could lead to the following: 1) Prior to publication, article rejection, or 2) Post-publication, sanctions ranging from, but not limited to, issuing a correction, reporting the inaccurate information to the authors' institution, banning authors from submitting work to ASN journals for varying lengths of time, and/or retraction of the published work.

Name: Constantijn Konings

Manuscript ID: K360-2024-000265R2

Manuscript Title: The role of Kt/V and creatinine clearance on assisting optimization of serum phosphorus levels among patients on PD

Date of Completion: August 26, 2024

Disclosure Updated Date: May 14, 2024



## ASN Journal Disclosure Form

As per ASN journal policy, I have disclosed any financial relationships or commitments I have held in the past 36 months as included below. I have listed my Current Employer below to indicate there is a relationship requiring disclosure. If no relationship exists, my Current Employer is not listed.

P. Kotanko reports the following:

Employer: Renal Research Institute; Ownership Interest: Fresenius Medical Care; Research Funding: Fresenius Medical Care; NIH; KidneyX; PCORI; Patents or Royalties: Multiple patents in the kidney space; and Advisory or Leadership Role: Editorial Board of Blood Purification; Editorial Board of Kidney and Blood Pressure Research; Editorial Board of Frontiers in Nephrology.

I understand that the information above will be published within the journal article, if accepted, and that failure to comply and/or to accurately and completely report the potential financial conflicts of interest could lead to the following: 1) Prior to publication, article rejection, or 2) Post-publication, sanctions ranging from, but not limited to, issuing a correction, reporting the inaccurate information to the authors' institution, banning authors from submitting work to ASN journals for varying lengths of time, and/or retraction of the published work.

Name: Peter Kotanko

Manuscript ID: K360-2024-000265R2

Manuscript Title: The role of Kt/V and creatinine clearance on assisting optimization of serum phosphorus levels among patients on PD

Date of Completion: September 8, 2024

Disclosure Updated Date: May 6, 2024

## ASN Journal Disclosure Form

As per ASN journal policy, I have disclosed any financial relationships or commitments I have held in the past 36 months as included below. I have listed my Current Employer below to indicate there is a relationship requiring disclosure. If no relationship exists, my Current Employer is not listed.

A. Mermelstein reports the following:

Employer: Renal Research Institute; and Research Funding: Vifor Fresenius Medical Care Renal Pharma.

I understand that the information above will be published within the journal article, if accepted, and that failure to comply and/or to accurately and completely report the potential financial conflicts of interest could lead to the following: 1) Prior to publication, article rejection, or 2) Post-publication, sanctions ranging from, but not limited to, issuing a correction, reporting the inaccurate information to the authors' institution, banning authors from submitting work to ASN journals for varying lengths of time, and/or retraction of the published work.

Name: Ariella E. Mermelstein

Manuscript ID: K360-2024-000265R1

Manuscript Title: The role of Kt/V and creatinine clearance on assisting optimization of serum phosphorus levels among patients on PD.

Date of Completion: July 25, 2024

Disclosure Updated Date: May 28, 2024

## ASN Journal Disclosure Form

As per ASN journal policy, I have disclosed any financial relationships or commitments I have held in the past 36 months as included below. I have listed my Current Employer below to indicate there is a relationship requiring disclosure. If no relationship exists, my Current Employer is not listed.

T. Moraes reports the following:

Employer: Pontificia Universidade Catolica do Parana; Consultancy: Astrazeneca; Baxter Healthcare; Bayer; Boehringer; Lilly; Novo Nordisk; Research Funding: Baxter Healthcare; Honoraria: Astrazeneca; Baxter Healthcare; Bayer; Boehringer; Lilly; Novo Nordisk; and Advisory or Leadership Role: Peritoneal Dialysis International - Editorial Board; Brazilian Journal of Nephrology - Co-Editor in Chief; International Society for Peritoneal Dialysis - Coordinator ISPD International Studies Committee.; Latin American Society of Nephrology and Hypertension (SLANH) - Coordinator Peritoneal Dialysis Comittee.

I understand that the information above will be published within the journal article, if accepted, and that failure to comply and/or to accurately and completely report the potential financial conflicts of interest could lead to the following: 1) Prior to publication, article rejection, or 2) Post-publication, sanctions ranging from, but not limited to, issuing a correction, reporting the inaccurate information to the authors' institution, banning authors from submitting work to ASN journals for varying lengths of time, and/or retraction of the published work.

Name: Thyago Proença de Moraes

Manuscript ID: K360-2024-000265R2

Manuscript Title: The role of Kt/V and creatinine clearance on assisting optimization of serum phosphorus levels among patients on PD.

Date of Completion: August 30, 2024

Disclosure Updated Date: May 14, 2024

## ASN Journal Disclosure Form

As per ASN journal policy, I have disclosed any financial relationships or commitments I have held in the past 36 months as included below. I have listed my Current Employer below to indicate there is a relationship requiring disclosure. If no relationship exists, my Current Employer is not listed.

V. Peters reports the following:

Employer: Tilburg University

I understand that the information above will be published within the journal article, if accepted, and that failure to comply and/or to accurately and completely report the potential financial conflicts of interest could lead to the following: 1) Prior to publication, article rejection, or 2) Post-publication, sanctions ranging from, but not limited to, issuing a correction, reporting the inaccurate information to the authors' institution, banning authors from submitting work to ASN journals for varying lengths of time, and/or retraction of the published work.

Name: Vincent Peters

Manuscript ID: K360-2024-000265R1

Manuscript Title: The role of Kt/V and creatinine clearance on assisting optimization of serum phosphorus levels among patients on PD.

Date of Completion: July 25, 2024

Disclosure Updated Date: May 21, 2024

## ASN Journal Disclosure Form

As per ASN journal policy, I have disclosed any financial relationships or commitments I have held in the past 36 months as included below. I have listed my Current Employer below to indicate there is a relationship requiring disclosure. If no relationship exists, my Current Employer is not listed.

J. Raimann reports the following:

Employer: Renal Research Institute, a wholly owned subsidiary of Fresenius Medical Care; Ownership Interest: owning shares of stock in Fresenius Medical Care; and Other Interests or Relationships: Member of the Board of Directors "Easy Water for Everyone" (501c3).

I understand that the information above will be published within the journal article, if accepted, and that failure to comply and/or to accurately and completely report the potential financial conflicts of interest could lead to the following: 1) Prior to publication, article rejection, or 2) Post-publication, sanctions ranging from, but not limited to, issuing a correction, reporting the inaccurate information to the authors' institution, banning authors from submitting work to ASN journals for varying lengths of time, and/or retraction of the published work.

Name: Jochen G. Raimann

Manuscript ID: K360-2024-000265R1

Manuscript Title: The role of Kt/V and creatinine clearance on assisting optimization of serum phosphorus levels among patients on PD.

Date of Completion: July 25, 2024

Disclosure Updated Date: May 15, 2024

## ASN Journal Disclosure Form

As per ASN journal policy, I have disclosed any financial relationships or commitments I have held in the past 36 months as included below. I have listed my Current Employer below to indicate there is a relationship requiring disclosure. If no relationship exists, my Current Employer is not listed.

S. Sharma reports the following:  
Employer: Mount Sinai Hospital

I understand that the information above will be published within the journal article, if accepted, and that failure to comply and/or to accurately and completely report the potential financial conflicts of interest could lead to the following: 1) Prior to publication, article rejection, or 2) Post-publication, sanctions ranging from, but not limited to, issuing a correction, reporting the inaccurate information to the authors' institution, banning authors from submitting work to ASN journals for varying lengths of time, and/or retraction of the published work.

Name: Shuchita Sharma

Manuscript ID: K360-2024-000265R2

Manuscript Title: The role of Kt/V and creatinine clearance on assisting optimization of serum phosphorus levels among patients on PD

Date of Completion: September 17, 2024

Disclosure Updated Date: May 22, 2024

## ASN Journal Disclosure Form

As per ASN journal policy, I have disclosed any financial relationships or commitments I have held in the past 36 months as included below. I have listed my Current Employer below to indicate there is a relationship requiring disclosure. If no relationship exists, my Current Employer is not listed.

J. Uribarri reports the following:

Employer: Icahn School of Medicine at Mount Sinai

I understand that the information above will be published within the journal article, if accepted, and that failure to comply and/or to accurately and completely report the potential financial conflicts of interest could lead to the following: 1) Prior to publication, article rejection, or 2) Post-publication, sanctions ranging from, but not limited to, issuing a correction, reporting the inaccurate information to the authors' institution, banning authors from submitting work to ASN journals for varying lengths of time, and/or retraction of the published work.

Name: Jaime Uribarri

Manuscript ID: K360-2024-000265R1

Manuscript Title: "The role of Kt/V and creatinine clearance on assisting optimization of serum phosphorus levels among patients on PD.

Date of Completion: July 25, 2024

Disclosure Updated Date: July 23, 2024
