# Supplementary material for: The Role of Kt/V and Creatinine Clearance on Assisting Optimization of Serum Phosphorus Levels among Patients on Peritoneal Dialysis
Source: PubMed Central journal article supplement (PMC11793178; doi:10.34067/kid.0000000618), 2024-10-11

**Supplementary Figure 1.** Distribution of serum phosphate levels across data sources.

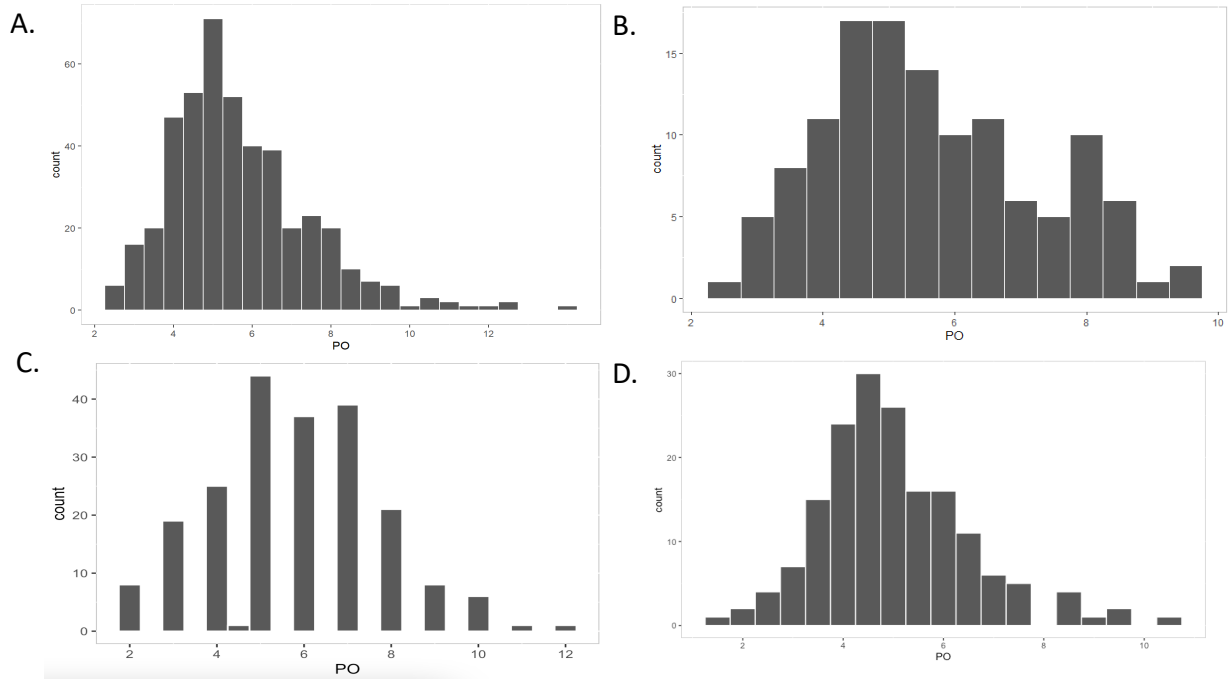

A: Renal Research Institute. B: Mount Sinai. C: Guadalajara. D: BRAZPD

**Supplementary Figure 2.** Distribution of Kt/V per CrCl by serum phosphate levels in the FMC-LATAM cohort.

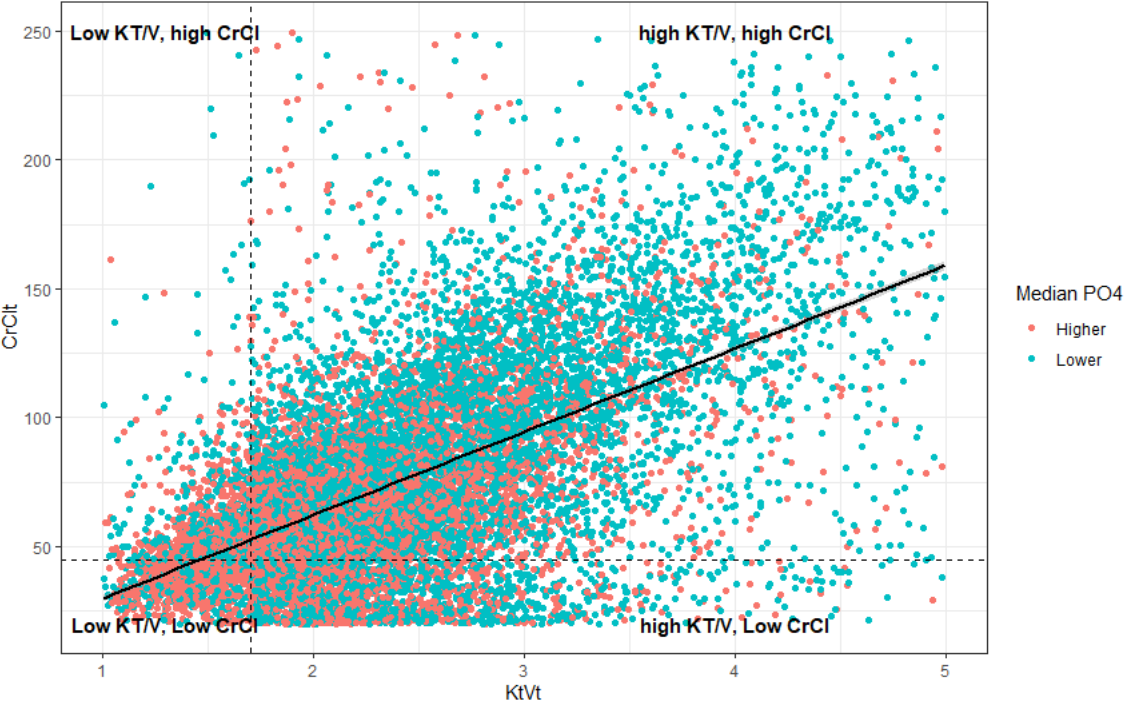

**Supplementary Figure 3.** Distribution of Kt/V per CrCl by serum phosphate levels in the BRAZPD cohort.

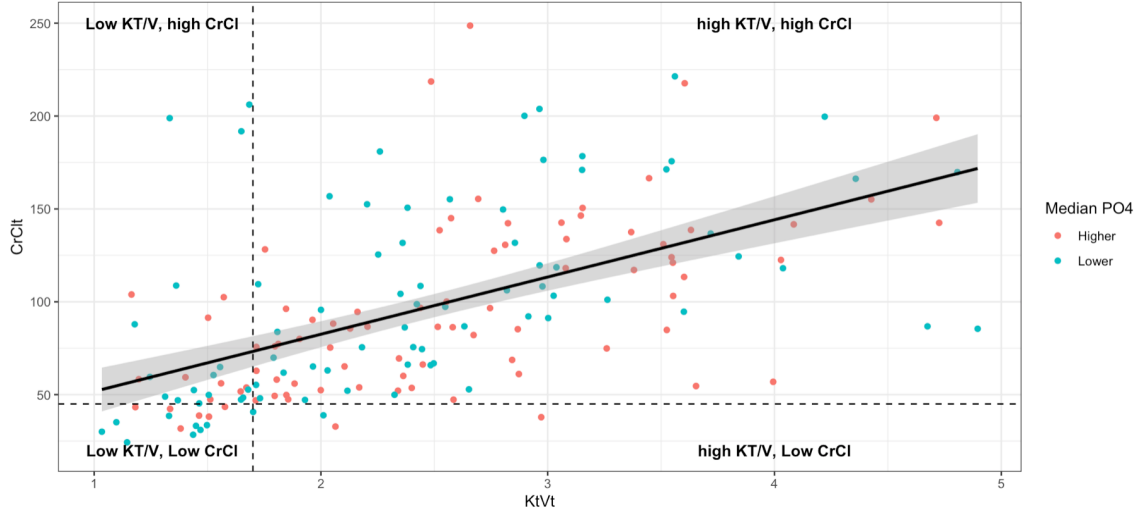

**Supplementary Figure 4.** Distribution of Kt/V per CrCl by serum phosphate levels in the RRI cohort.

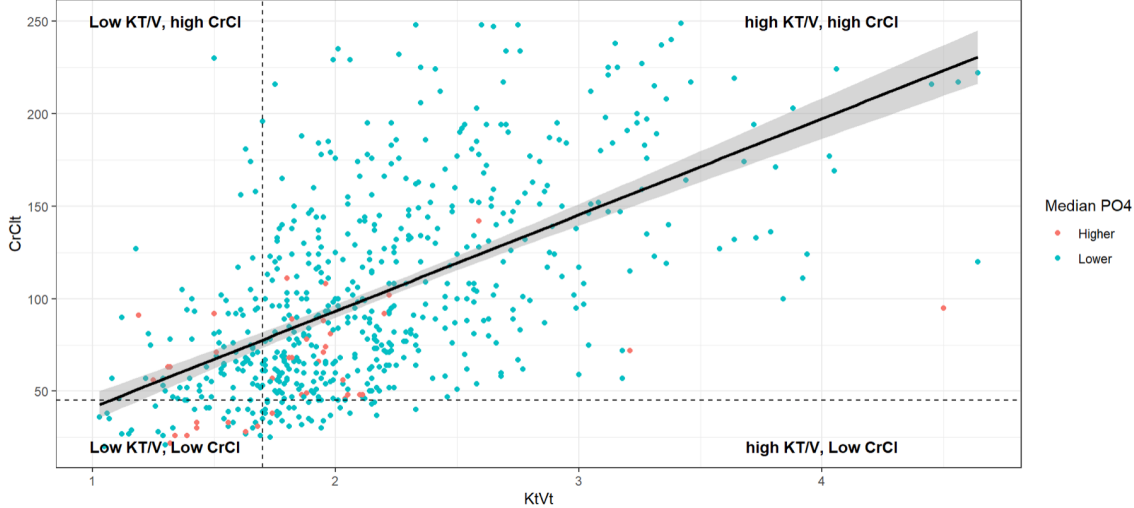

**Supplementary Figure 5.** Distribution of Kt/V per CrCl by serum phosphate levels in the Mount Sinai cohort.

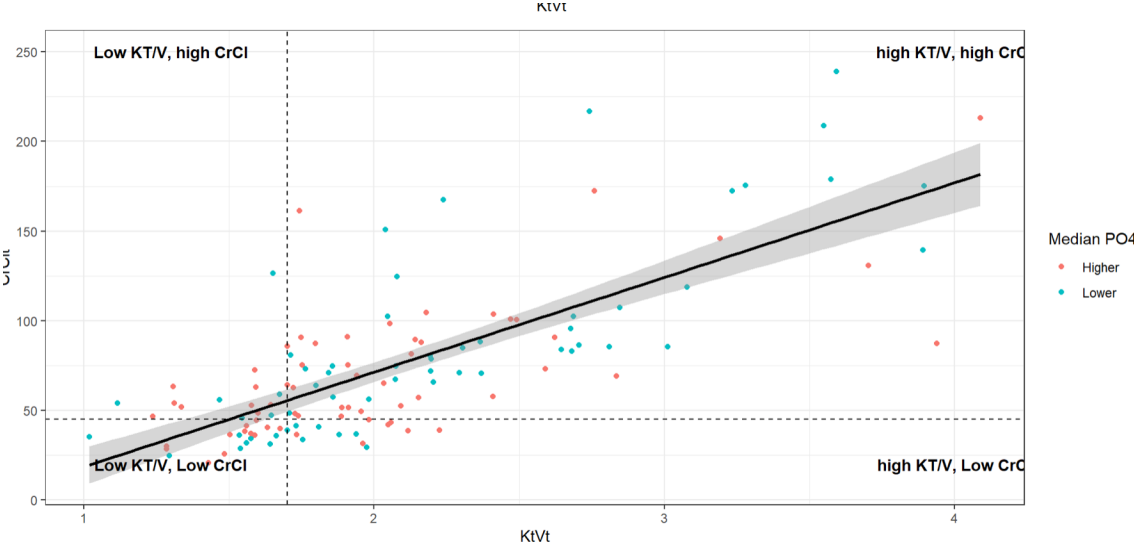

**Supplementary Figure 6.** Distribution of Kt/V per CrCl by serum phosphate levels in the Guadalajara cohort.

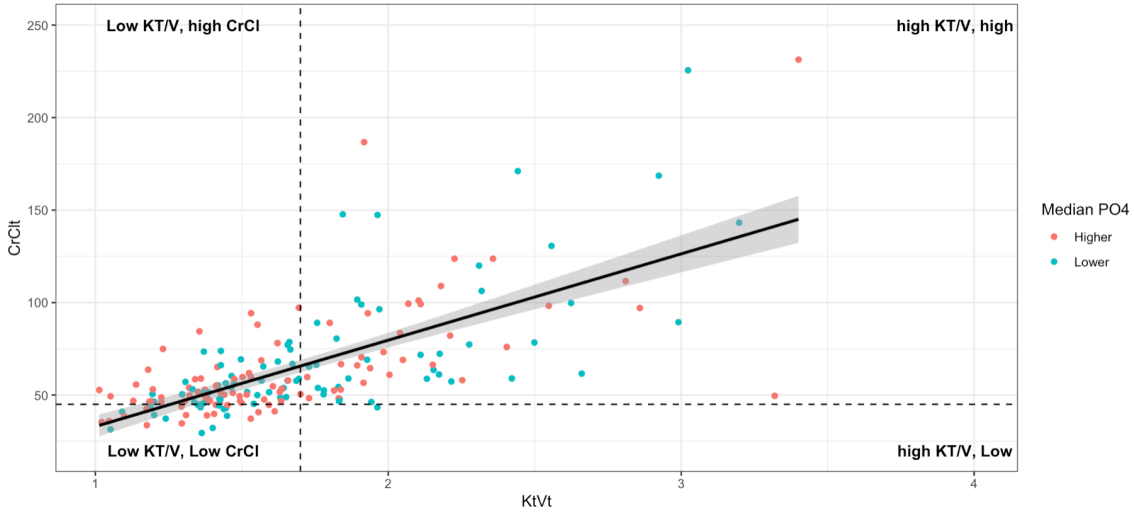

Supplement: kidney360-6-105-s002.pdf [file kidney360-6-105-s002.pdf]
